# Supplementary material
Source: bioRxiv or medRxiv preprint supplement (https://www.biorxiv.org/content/biorxiv/early/2020/04/25/2020.04.25.058891.1/DC3/embed/media-3.pdf)
Supplement: Supplementary file [file media-3.pdf]

Supplementary figure 1: Syntenic dotplot generated comparing the 17 apple chromosomes (chr1-chr17) of the GDDH13 assembly (x-axis, Daccord et al 2017) versus the primary haploid assembly MDGGph\_v1.0 (y-axis). Each dot indicates a syntenic gene pair between the two assemblies.

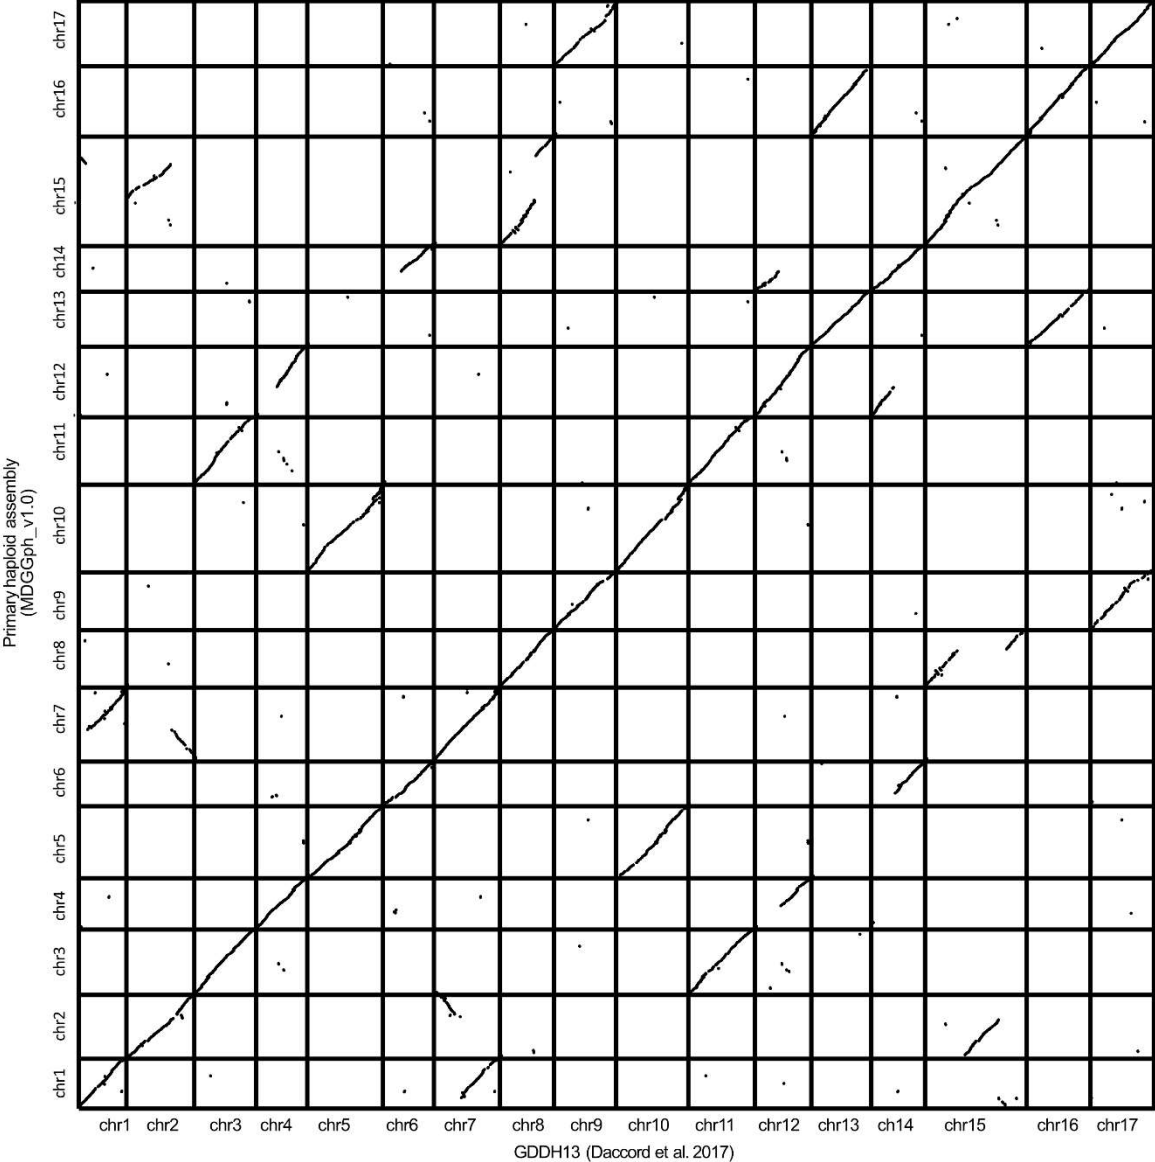

Supplementary table 1: Chromosome lengths of the haploid assemblies MDGGph\_v1.0 and MDGGsh\_v1.0 compared to HFTH1 (Zhang et al. 2019) and GDDH13 (Daccord et al 2017).

| MDGGph_v1.0<br>(primary haploid assembly) |             |           | MDGGsh_v1.0<br>(secondary haploid assembly) |             |           | HFTH1<br>(Zhang et al. 2019) |             |           | GDDH13<br>(Daccord et al 2017) |             |           |
|-------------------------------------------|-------------|-----------|---------------------------------------------|-------------|-----------|------------------------------|-------------|-----------|--------------------------------|-------------|-----------|
|                                           | Length (bp) | Scaffolds |                                             | Length (bp) | Scaffolds |                              | Length (bp) | Scaffolds |                                | Length (bp) | Scaffolds |
| chr1                                      | 34,957,745  | 2         | chr_s1                                      | 20,900,120  | 189       | chr1                         | 32,944,118  | 13        | chr1                           | 32,625,452  | 86        |
| chr2                                      | 43,219,086  | 2         | chr_s2                                      | 42,574,754  | 180       | chr2                         | 38,449,405  | 9         | chr2                           | 37,577,729  | 88        |
| chr3                                      | 41,865,124  | 2         | chr_s3                                      | 35,827,395  | 240       | chr3                         | 37,138,690  | 5         | chr3                           | 37,524,076  | 81        |
| chr4                                      | 36,846,674  | 2         | chr_s4                                      | 26,433,372  | 183       | chr4                         | 31,012,745  | 8         | chr4                           | 32,301,874  | 65        |
| chr5                                      | 46,262,512  | 3         | chr_s5                                      | 58,045,489  | 239       | chr5                         | 47,891,858  | 14        | chr5                           | 47,952,461  | 108       |
| chr6                                      | 37,227,775  | 3         | chr_s6                                      | 46,706,699  | 155       | chr6                         | 35,567,198  | 6         | chr6                           | 37,137,259  | 89        |
| chr7                                      | 42,138,739  | 3         | chr_s7                                      | 23,675,059  | 246       | chr7                         | 35,934,761  | 6         | chr7                           | 36,691,129  | 76        |
| chr8                                      | 37,261,338  | 1         | chr_s8                                      | 25,480,337  | 200       | chr8                         | 31,511,015  | 8         | chr8                           | 31,609,270  | 67        |
| chr9                                      | 42,757,514  | 1         | chr_s9                                      | 30,211,764  | 217       | chr9                         | 34,800,404  | 10        | chr9                           | 37,604,908  | 80        |
| chr10                                     | 49,447,705  | 2         | chr_s10                                     | 46,315,672  | 241       | chr10                        | 43,815,736  | 14        | chr10                          | 41,762,413  | 83        |
| chr11                                     | 46,034,967  | 3         | chr_s11                                     | 48,391,545  | 218       | chr11                        | 42,456,296  | 15        | chr11                          | 43,059,885  | 91        |
| chr12                                     | 37,592,879  | 1         | chr_s12                                     | 19,120,998  | 191       | chr12                        | 32,285,079  | 9         | chr12                          | 33,050,054  | 75        |
| chr13                                     | 40,714,413  | 1         | chr_s13                                     | 37,617,649  | 237       | chr13                        | 44,866,511  | 13        | chr13                          | 44,339,518  | 119       |
| chr14                                     | 36,122,606  | 1         | chr_s14                                     | 39,177,835  | 148       | chr14                        | 31,515,206  | 6         | chr14                          | 32,513,452  | 62        |
| chr15                                     | 60,319,455  | 2         | chr_s15                                     | 48,141,362  | 339       | chr15                        | 56,644,392  | 16        | chr15                          | 54,945,402  | 129       |
| chr16                                     | 47,681,219  | 1         | chr_s16                                     | 28,833,803  | 228       | chr16                        | 41,670,059  | 15        | chr16                          | 41,389,449  | 93        |
| chr17                                     | 39,000,747  | 1         | chr_s17                                     | 23,971,657  | 211       | chr17                        | 33,998,825  | 8         | chr17                          | 34,748,701  | 76        |
|                                           |             |           | Unanchored                                  | 80,621,795  | 2583      | Unanchored                   | 7,992,922   |           | Unanchored                     | 52,728,359  |           |

Supplementary table 2: Results of the Benchmarking Universal Single-Copy Orthologs (BUSCO) analysis on the assemblies MDGGph\_v1.0, MDGGdi\_v1.0 and on GDDH13 (Daccord *et al.* 2017).

|                                            | <b>MDGGph_v1.0</b>                |       | <b>MDGGdi_v1.0</b>        |       | <b>GDDH13</b>                |       |
|--------------------------------------------|-----------------------------------|-------|---------------------------|-------|------------------------------|-------|
|                                            | <b>(primary haploid assembly)</b> |       | <b>(diploid assembly)</b> |       | <b>(Daccord et al. 2017)</b> |       |
| <b>Complete BUSCOs (C)</b>                 | 1,347                             | 93.5% | 1,387                     | 96.3% | 1,383                        | 96.0% |
| <b>Complete and single-copy BUSCOs (S)</b> | 943                               | 65.5% | 467                       | 32.4% | 894                          | 62.1% |
| <b>Complete and duplicated BUSCOs (D)</b>  | 404                               | 28.1% | 920                       | 63.9% | 489                          | 34.0% |
| <b>Fragmented BUSCOs (F)</b>               | 20                                | 1.4%  | 11                        | 0.8%  | 13                           | 0.9%  |
| <b>Missing BUSCOs (M)</b>                  | 73                                | 5.1%  | 42                        | 2.9%  | 44                           | 3.1%  |
| <b>Total BUSCO groups searched</b>         | 1,440                             |       | 1,440                     |       | 1,440                        |       |
